# Supplementary material
Source: PubMed Central journal article supplement (PMC1482646)

**A**

|                              |       |       |        |       |        |       |       |       |       |       |       |       |      |
|------------------------------|-------|-------|--------|-------|--------|-------|-------|-------|-------|-------|-------|-------|------|
| Phox2a/b mouse               | QRRIR | TTFTS | AQLKE  | LERVF | AETHY  | PDIYT | REELA | LKIDL | TEARV | QVWFQ | NRRAK | FRKQE |      |
| Phox2a/b human               | ----- | ----- | -----  | ----- | -----  | ----- | ----- | ----- | ----- | ----- | ----- | ----- | 100% |
| Phox2a/b xenopus             | ----- | ----- | -----  | ----- | -----  | ----- | ----- | ----- | ----- | ----- | ----- | ----- | 100% |
| Phox2 amphioxus              | ----- | ----- | -----  | ----- | -----  | ----- | ----- | ----- | ----- | ----- | ----- | ----- | 100% |
| Phox2 <i>C. intestinalis</i> | ----- | ----- | S----- | --K-- | -----  | ----- | ----- | ----- | ----- | ----- | ----- | W--M- | 93%  |
| Phox2 <i>C. elegans</i>      | ----- | ----- | G----- | --S-  | C----- | ----- | ---I- | MR--- | ----- | ----- | ----- | Y---- | 88%  |

**B**

 region cloned in pSD-YFP

conserved regions :

 non coding sequence

 coding sequence

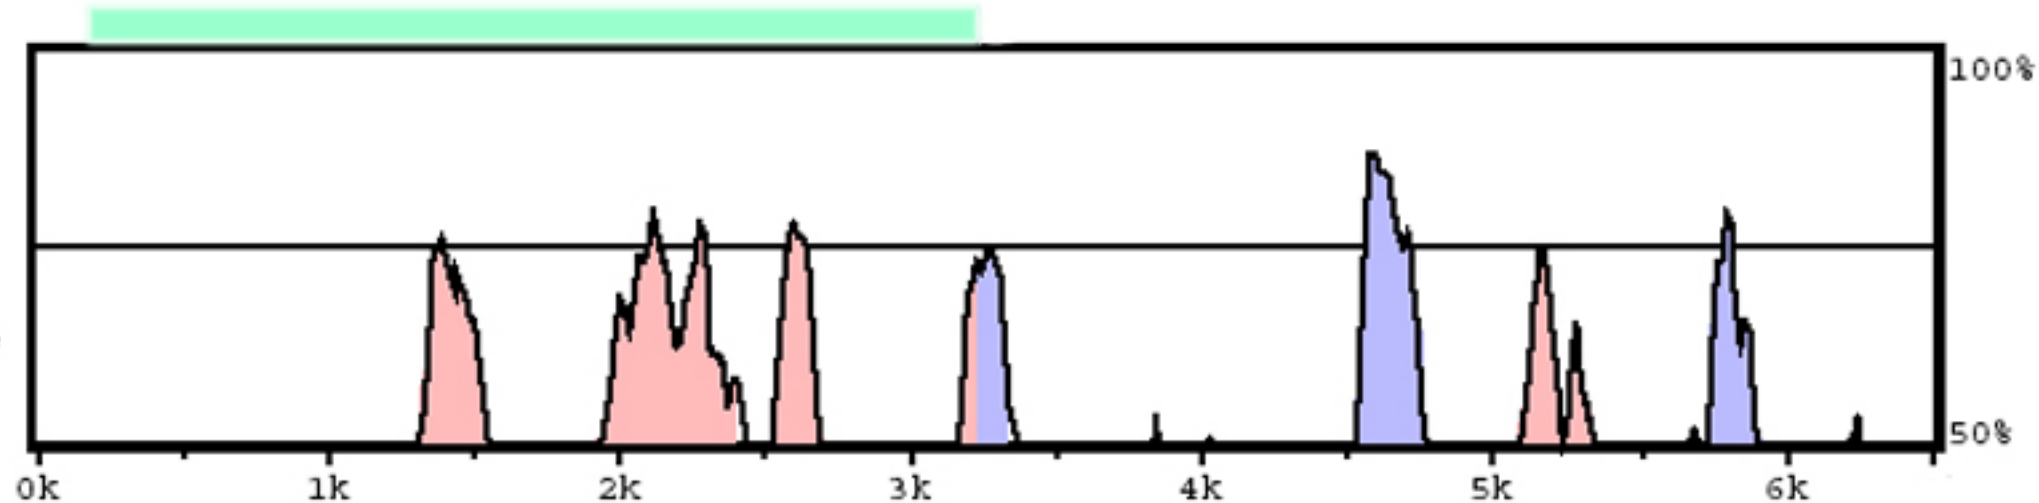

Supplement: pnas_0600805103_1.pdf [file pnas_0600805103_1.pdf]
